# Supplementary material for: Modeling the Effect of Optical Signal Multipath
Source: MDPI journal article supplement (doi:10.3390/s17092038), 2017-09-06
Supplement: s1 [file s1]

## Sheet: 2018_field_data
Random Generated GIS Points					Observational Data				Spatial Data				Land Cover Type Data (Pertains only to the Representative Area)
Data Entry #	GIS Point Name (Random Generated)	GIS Easting	GIS Northing		Date	Time of Day	Point Accessible		GPS Point Name	GPS Easting	GPS Northing		Land Cover Class	Dominant Vegetation Type	Approx Avg. Height (m) Dom. Veg.	Vegetation (% Cover)	Size and Shape Sample Area	Distribution of Veg. In Sample Area	% Cover Dom. Veg.	Water Innundation	GPS point within sample area	Camera name	List of photos (in N, E, S, W directions)	Other Site Specific Comments

## Sheet: meta_data
Variable	Type	Description	Formate/ Data List
Data Entry #	factor	the session number	1- ###
GIS Point Name (Random Generated)
GIS Northing
GIS Easting
clan
Date
Time of Day
Point Accessible
GPS Point Name
GPS Northing
GPS Easting
Land Cover Class	factor		human	barren light	barren red	barren dark	short grass	med grass	long grass	elephant grass	grass balanites	shrub croton	shrub euclea	shrub general	forest upland	forest riverine	wetland meadow	wetland emergent	wetland floating	water	other
Dominant Vegetation Type
Approx Avg. Height (m) Dom. Veg.
Dominate Vegetation (% Cover)
Size and Shape Sample Area
Distribution of Veg. In Sample Area
% Canopy Cover Dom. Veg.
Water Innundation
GPS point within sample area
Camera name
List of photos (in N, E, S, W directions)
Other Site Specific Comments
